# Supplementary material for: A Deletion in the N-Myc Downstream Regulated Gene 1 (NDRG1) Gene in Greyhounds with Polyneuropathy
Source: PubMed Central journal article supplement (PMC2889825; doi:10.1371/journal.pone.0011258), 2010-06-22
Supplement: pone.0011258.s001.pdf [file pone.0011258.s001.pdf]

**Table S1.** *NDRG1* polymorphisms

|                |       | <i>exon 1</i> | <i>intron 1</i> | <i>intron 1</i> | <i>intron 3</i> | <i>intron 7</i> | <i>exon 9</i> | <i>intron 9</i> | <i>intron 14</i> | <i>intron 14</i> | <i>exon 15</i>           |
|----------------|-------|---------------|-----------------|-----------------|-----------------|-----------------|---------------|-----------------|------------------|------------------|--------------------------|
| Boxer assembly |       | G             | A               | C               | T               | G               | T             | G               | A                | T                | TCGCCTGGAC               |
|                |       | c.51G>A       | c.63+37A>T      | c.63+41C>T      | c.206-68T>C     | c.538-42G>A     | c.675T>C      | c.698+68G>A     | c.943+36A>G      | c.943+51T>C      | c.1080_1089delTCGCCTGGAC |
| case           | GY014 | AA            | TT              | TT              | CC              | AA              | CC            | GG              | GG               | TT               | del/del                  |
| case           | GY028 | AA            | TT              | TT              | CC              | AA              | CC            | GG              | GG               | TT               | del/del                  |
| carrier        | GY022 | AA            | TT              | TT              | CC              | AA              | CC            | GG              | GG               | TT               | wt/del                   |
| carrier        | GY025 | AA            | TT              | TT              | CC              | AA              | CC            | GG              | GG               | TT               | wt/del                   |
| control        | GY033 | AA            | TT              | TT              | CC              | AA              | CC            | AG              | GG               | TT               | wt/wt                    |
| control        | GY038 | AA            | TT              | TT              | CC              | AA              | CC            | AG              | GG               | CT               | wt/wt                    |
