# Supplementary material for: A Deletion in the N-Myc Downstream Regulated Gene 1 (NDRG1) Gene in Greyhounds with Polyneuropathy
Source: PubMed Central journal article supplement (PMC2889825; doi:10.1371/journal.pone.0011258), 2010-06-22

**Figure S1.** Selected electrophysiological registrations from a 9-month-old Greyhound affected by polyneuropathy.

(A, B, C) Electromyography from left infraspinatus, short digital extensor and cranial tibial muscles, showing pathological spontaneous activity in the form of positive sharp waves.

(D) Motor nerve conduction studies from left ulnar nerve, showing abnormally slow nerve conduction velocity (37.3 m/s) and a decrease in the amplitude of the compound muscle action potential.

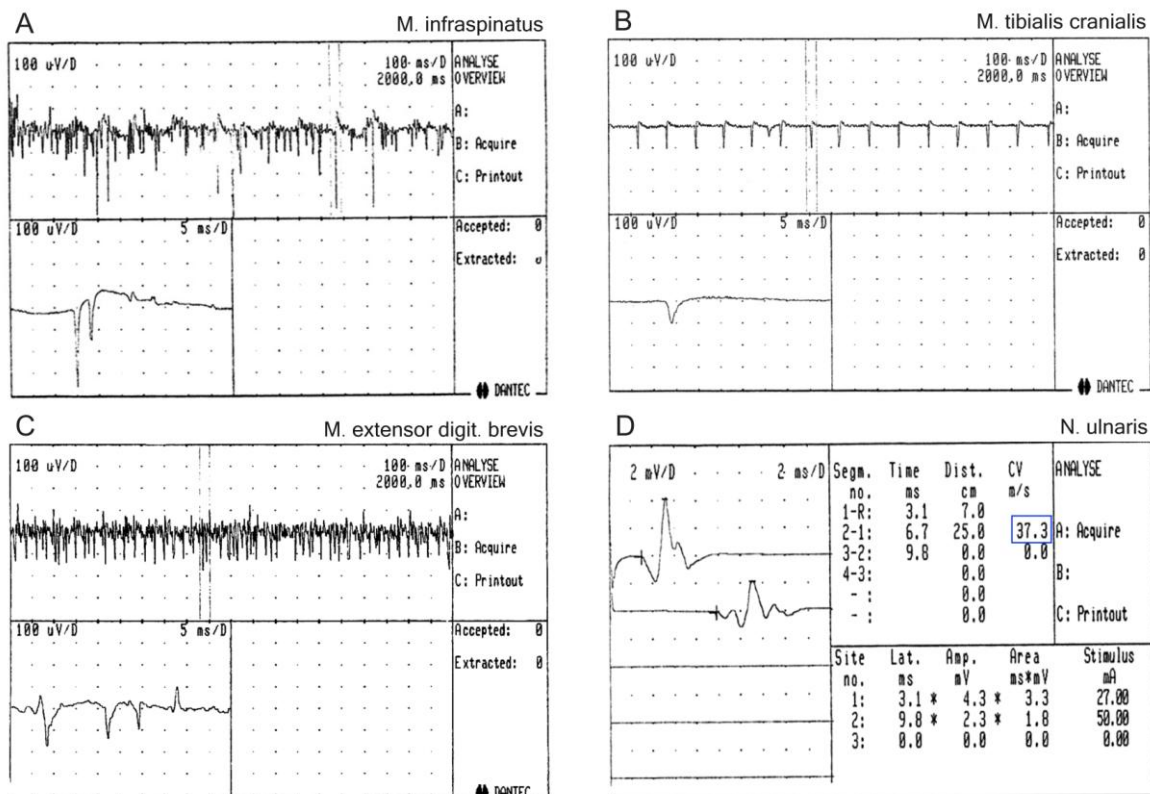

Supplement: pone.0011258.s002.pdf [file pone.0011258.s002.pdf]
